# Supplementary material for: G-quadruplex DNA selective targeting for anticancer therapy: a computational study of a novel PtII monofunctional complex activated by adaptive binding
Source: Royal Society of Chemistry journal article supplement (doi:10.1039/d3dt02678g), 2023-01-01
Supplement: d3dt02678g1.pdf [file d3dt02678g1.pdf]

## Electronic Supplementary Information

# G-quadruplex DNA selective targeting for anticancer therapy. A computational study of a novel Pt<sup>II</sup> monofunctional complex activated by adaptive binding

Daniele Belletto,<sup>a</sup> Fortuna Ponte,<sup>a</sup> Nico Sanna,<sup>b</sup> Stefano Scoditti,<sup>a\*</sup> and Emilia Sicilia<sup>a</sup>

<sup>a</sup> Department of Chemistry and Chemical Technologies, Università della Calabria, Arcavacata di Rende (CS), 87036, Italy;

<sup>b</sup> Department for Innovation in Biology Agro-Food and Forest Systems (DIBAF), University of Tuscia, Largo dell'Università snc, 01100 Viterbo, Italy.

### Table of Contents

- **Figure S1.** Adopted monomeric parallel-stranded G-quadruplex structure formed in human VEGF promoter (PDB ID 2M27). Two potassium ions have been included in the calculations. S2
- **Figure S2.** Downsized G-Q model cut from the monomeric parallel-stranded G-quadruplex structure used for MD calculations together with the structures of the adducts formed by the **Pt1** complex in orientations named A and B with this G-Q model. S3
- **Figure S3.** DFT calculated free energy profiles in water describing the a) guanine attack of **Pt1** and b) water displacement by methionine from the aquated form **Pt1<sub>wat</sub>**. Geometrical structures of the stationary points intercepted along the paths are also reported. Relative energies are in kcal mol<sup>-1</sup> and calculated with respect the zero reference energy of the initial adduct. S4
- **Figure S4.** Fully optimized geometrical structure of all the stationary points intercepted along the pathways describing the transformation of **Pt1**, in its orientations B into **Pt2**. S5
- **Figure S5** Fully optimized geometrical structure of all the stationary points intercepted along the pathways describing the transformation of **Pt1<sub>wat</sub>**, in its orientations A into **Pt2**. S6
- **Figure S6.** Plots of the RDG analysis of non-covalent interactions for the stationary points located along the free energy profile describing the transformation of **Pt1<sub>wat</sub>**, in A and B orientations, into **Pt2** in presence of G-Q. S7
- **Figure S7.** Fully optimized geometrical structure of all the stationary points intercepted along the pathways describing the aquation of **Pt1** in its orientation C and orientation D. S8
- **Figure S8.** Plots of the RDG analysis of non-covalent interactions for the stationary points located along the free energy profile describing the aquation of **Pt1**, in C and D orientations, in presence of G-Q. S9
- **Figure S9.** RMSD plot of MD1 and MD2. S10
- **Figure S10.** Structural comparison between the binding poses of the **Pt2** complex in MD1 and MD2 (MD1 silver, MD2 blue). S11
- **Figure S11.** G-Q DNA length changes calculated for MD1, MD2 and G-Q alone. S12
- **Table S1.** Contributions to the MM-GBSA binding free energy for the Q-G **Pt2** complex adducts. Van der Waals, electrostatic, polar and non-polar contributions to the solvation free energy, total gas phase and solvation binding energy, resulting MM-GBSA binding energy and the estimation of the entropy term by quasi-harmonic analysis are reported. S13
- Developed parameters for **P2** S14

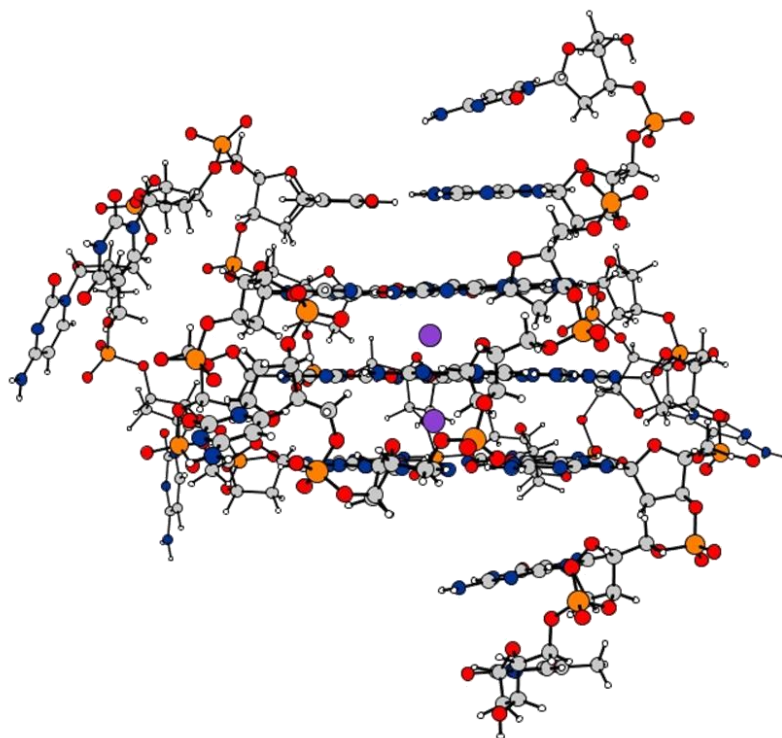

Figure S1

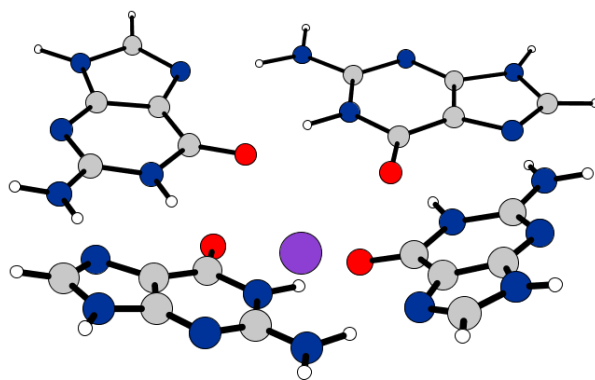

Orientation A

Orientation B

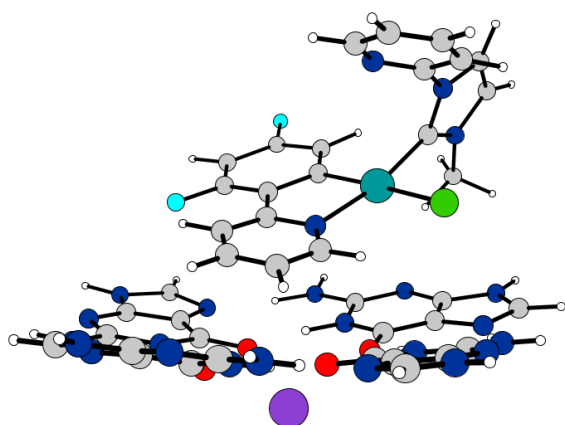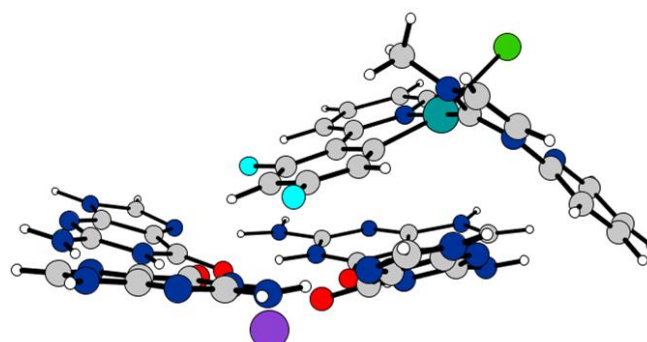

Figure S2.

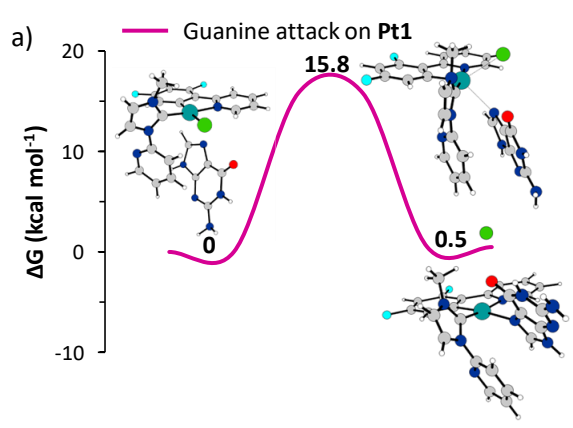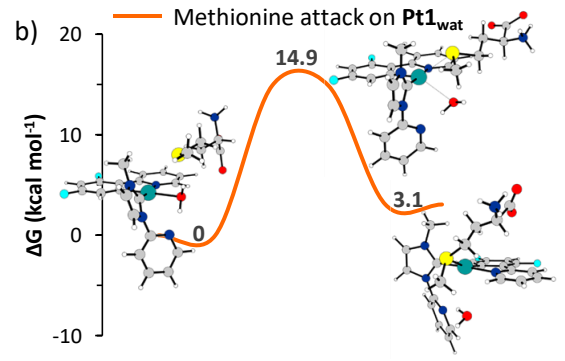

Figure S3

### Orientation A

React\_G-Q\_Pt1(A)

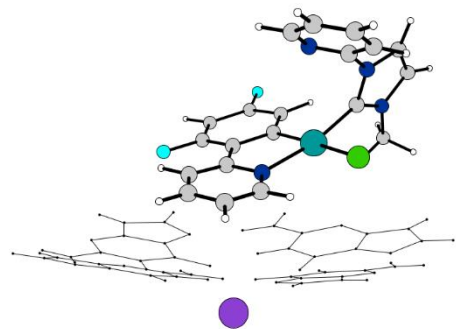

TS\_G-Q\_Pt1(A)

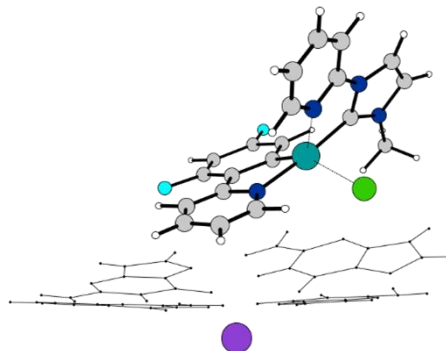

Prod\_G-Q\_Pt2(A)+Cl<sup>-</sup>

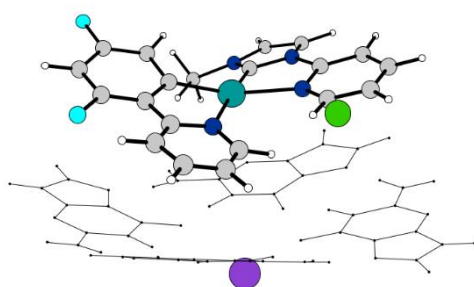

### Orientation B

React\_G-Q\_Pt1(B)

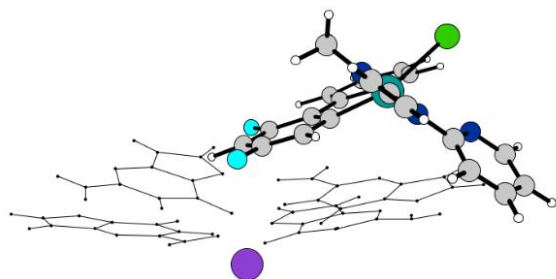

TS\_G-Q\_Pt1(B)

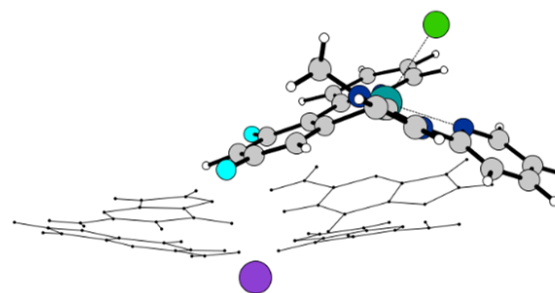

Prod\_G-Q\_Pt2(B)+Cl<sup>-</sup>

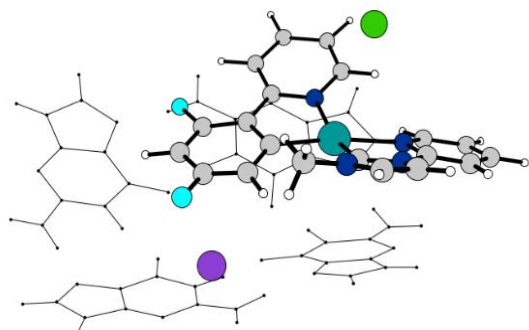

Figure S4

### Orientation A

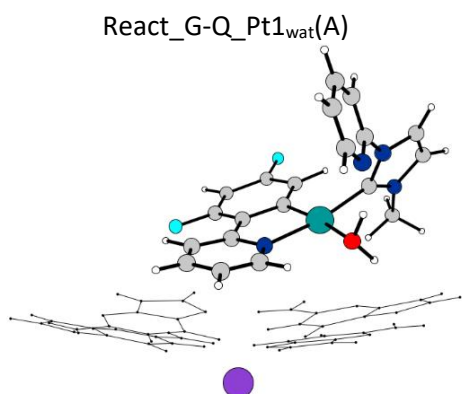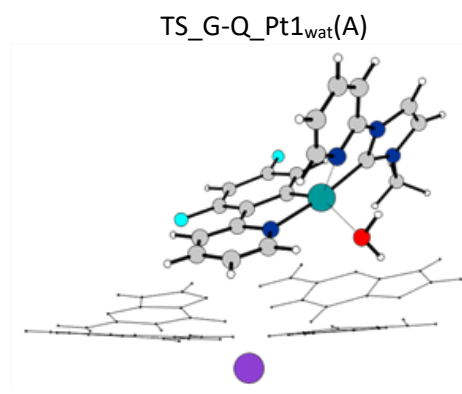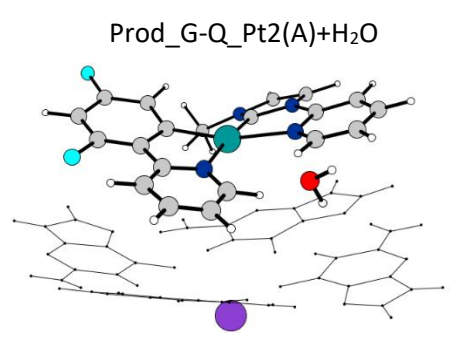

### Orientation B

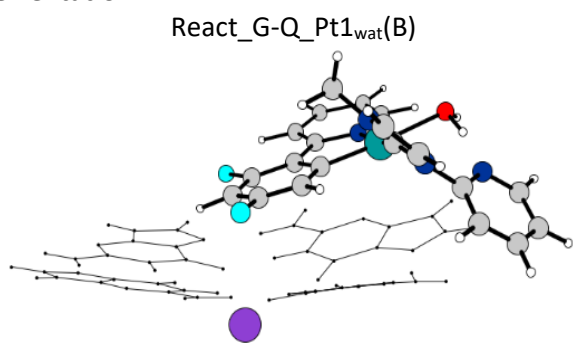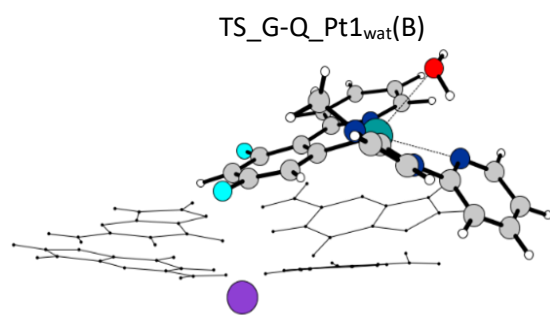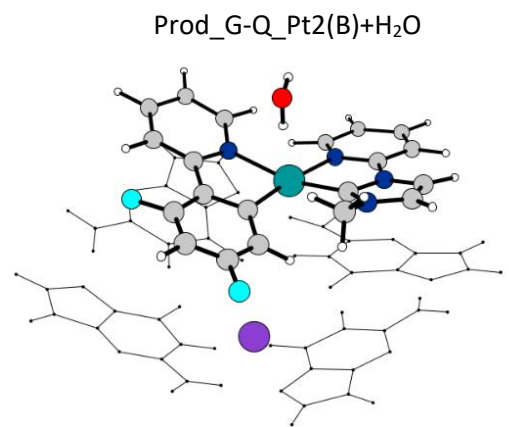

Figure S5

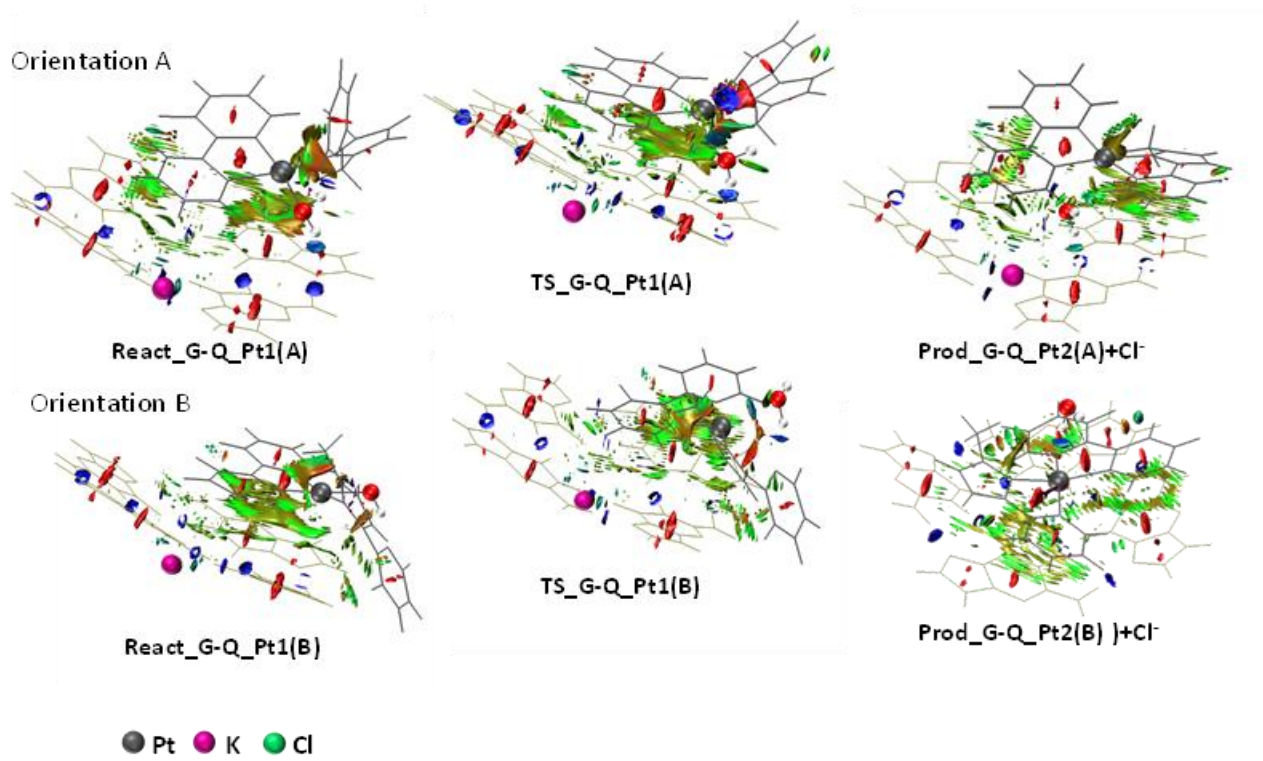

Figure S6

### Orientation C

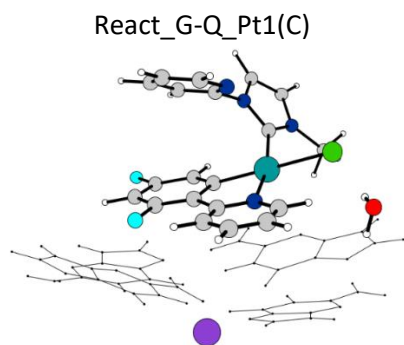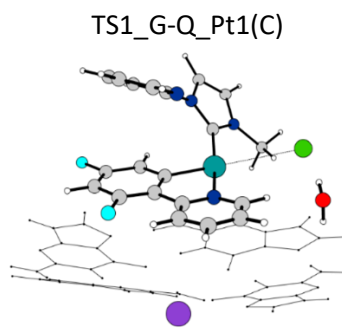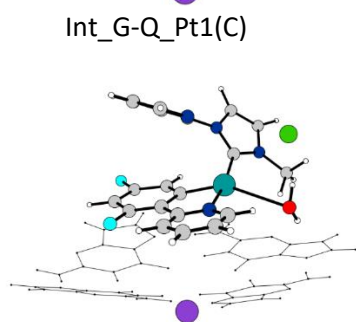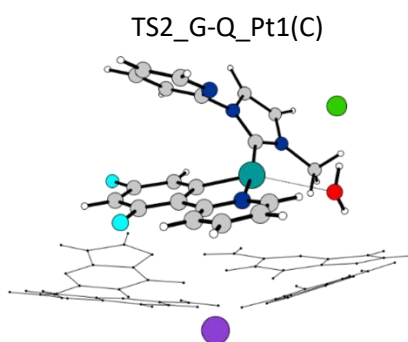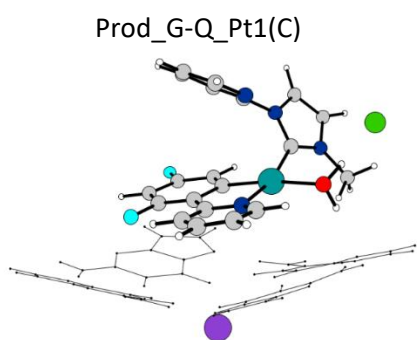

### Orientation D

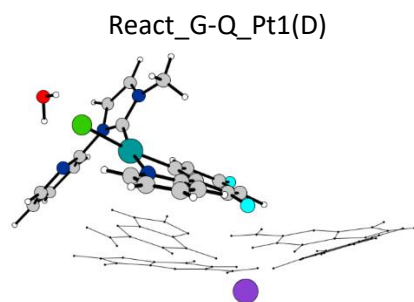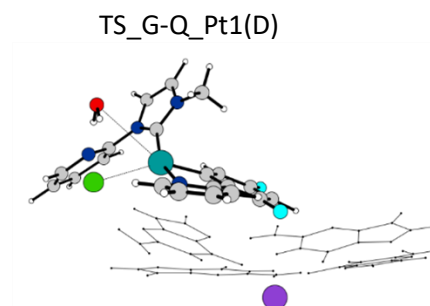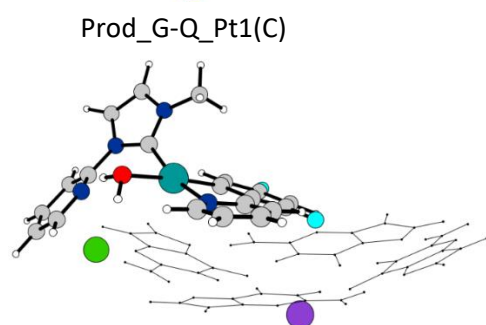

Figure S7



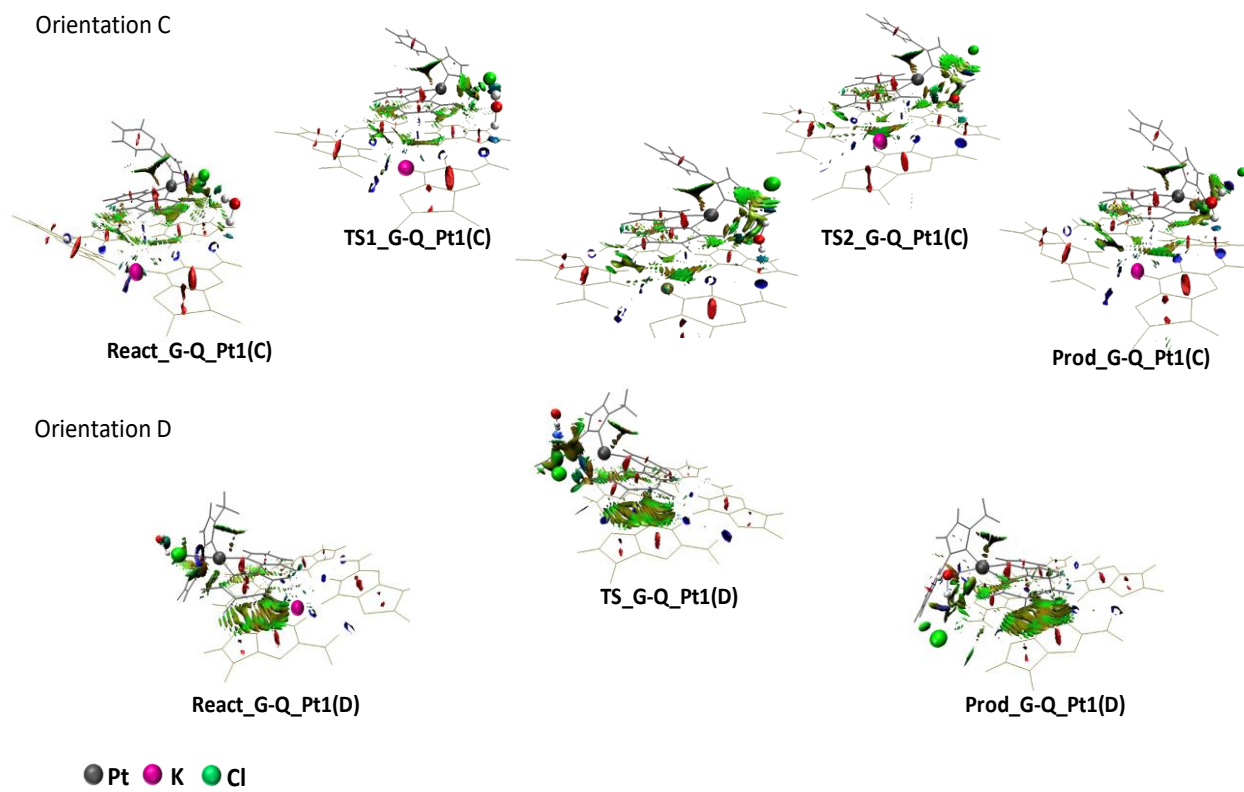

Figure S8

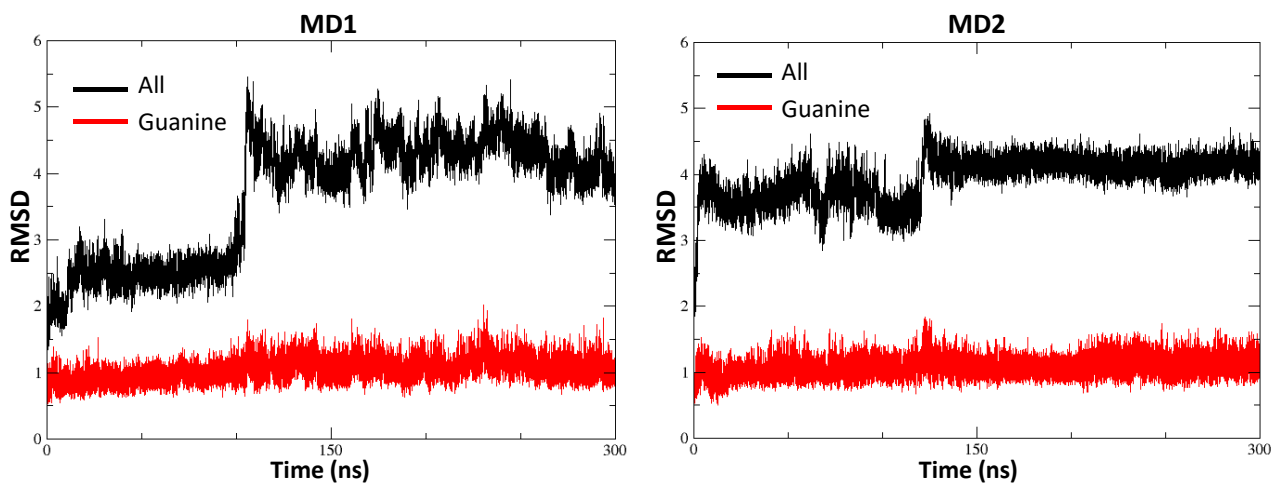

Figure S9

**Side View**

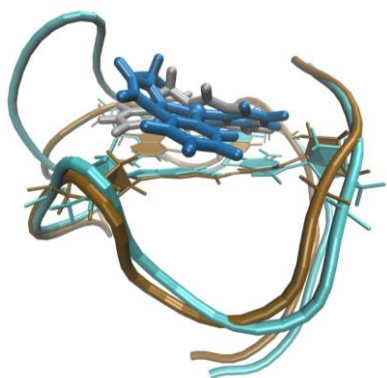

**Top View**

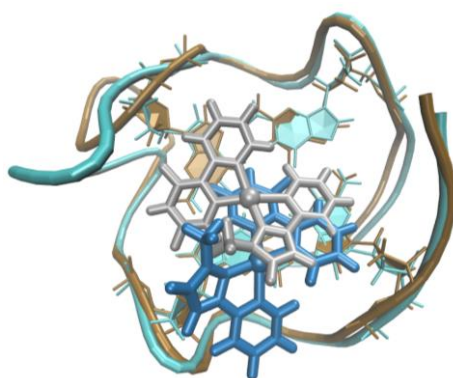

**Top view Pt2**

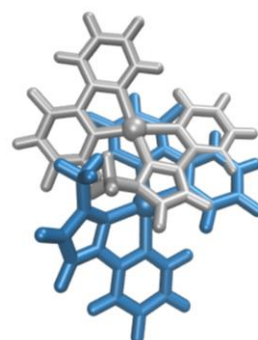

**Figure S10**

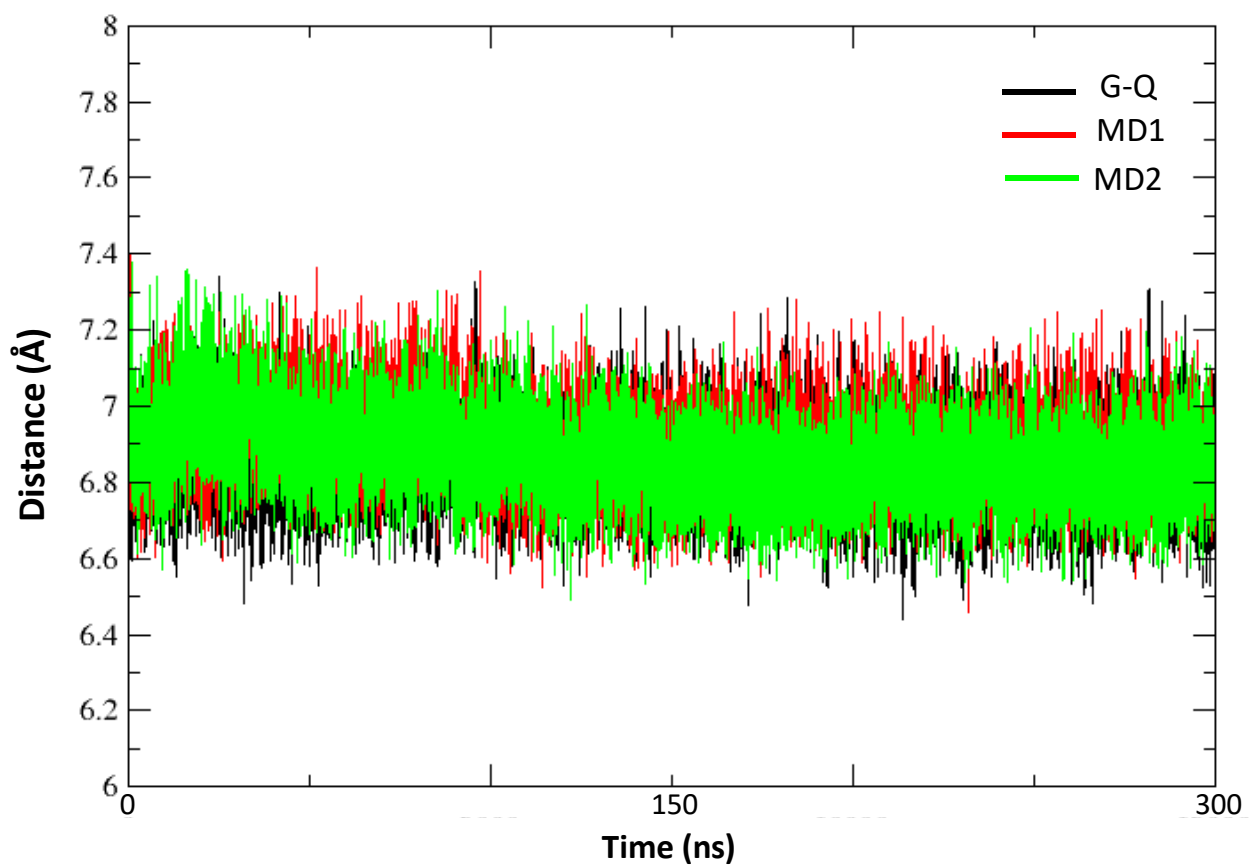

Figure S11

**Table S2.** Contributions to the MM-GBSA binding free energy for the G-quadruplex complex adducts. Van der Waals (VDWAALS), electrostatic (EEL), polar (EGB) and non-polar (ESURF) contributions to the solvation free energy, total gas phase ( $\Delta G$  gas) and solvation ( $\Delta G$  solv) binding energy, resulting MM-GBSA binding energy ( $\Delta G$  TOTAL) and the estimation of the entropy term by quasi-harmonic analysis are reported. All the values are in kcal mol<sup>-1</sup>.

|                                      | MD1          | MD2          |
|--------------------------------------|--------------|--------------|
| <b>Energy component</b>              |              |              |
| VDWAALS                              | -43.9        | -48.6        |
| EEL                                  | -529.5       | -553.6       |
| EGB                                  | 542.4        | 568.4        |
| ESURF                                | -3.2         | -3.9         |
| $\Delta G$ gas                       | -573.4       | -602.1       |
| $\Delta G$ solv                      | 539.2        | 564.4        |
| $\Delta G$ TOTAL                     | -34.2        | -37.7        |
| <br>                                 |              |              |
| Quasi-harmonic entropy approximation | -9.4         | -13.1        |
| $\Delta G$ binding                   | <b>-24.8</b> | <b>-24.6</b> |

## Developed parameters for Pt2

The phenylpyridine ligand bound to the platinum centers is named as AMN. Platinum center is named as PT. The carbene-pyridine ligand to platinum is named as AMQ.

### a) PT

0 0 2

This is a remark line

molecule.res

PT INT 0

CORRECT OMIT DU BEG

0.0000

```
1 DUMM DU M 0 -1 -2 0.000 .0 .0 .00000
2 DUMM DU M 1 0 -1 1.449 .0 .0 .00000
3 DUMM DU M 2 1 0 1.523 111.21 .0 .00000
4 PT M1 M 3 2 1 1.540 111.208 -180.000 -0.059578
```

LOOP

IMPROPER

DONE

STOP

### b) AMN

0 0 2

This is a remark line

molecule.res

AMN INT 0

CORRECT OMIT DU BEG

0.0000

```
1 DUMM DU M 0 -1 -2 0.000 .0 .0 .00000
2 DUMM DU M 1 0 -1 1.449 .0 .0 .00000
3 DUMM DU M 2 1 0 1.523 111.21 .0 .00000
4 F61 f M 3 2 1 1.540 111.208 -180.000 -0.132729
5 C64 ca M 4 3 2 1.350 35.574 178.322 0.155668
6 C63 ca M 5 4 3 1.384 116.794 -163.040 -0.184660
7 H61 ha E 6 5 4 1.081 120.993 -0.830 0.177256
8 C62 ca M 6 5 4 1.384 117.077 177.886 0.208039
9 F62 f E 8 6 5 1.342 118.844 -178.668 -0.147670
10 C61 ca M 8 6 5 1.390 122.565 1.331 -0.149811
11 H60 ha E 10 8 6 1.079 117.928 -177.675 0.140883
12 C66 Y3 M 10 8 6 1.393 119.843 0.614 -0.158412
13 C65 ca M 12 10 8 1.422 119.144 -2.772 0.010746
14 C67 ca M 13 12 10 1.462 116.446 -173.578 0.112614
15 C68 ca M 14 13 12 1.400 126.816 -172.071 -0.063229
16 H62 ha E 15 14 13 1.077 119.576 -1.346 0.131453
17 C69 ca M 15 14 13 1.387 119.894 177.778 -0.119015
18 H63 ha E 17 15 14 1.084 119.863 -179.848 0.166841
19 C70 ca M 17 15 14 1.392 119.642 -0.921 -0.106136
20 H64 ha E 19 17 15 1.081 121.928 -178.526 0.149840
21 C71 ca M 19 17 15 1.384 118.055 1.036 -0.052221
22 H65 h4 E 21 19 17 1.081 120.887 -177.792 0.116524
23 N61 Y1 M 21 19 17 1.343 122.839 0.734 0.002217
```

LOOP

C65 C64

N61 C67

IMPROPER

C65 C63 C64 F61  
C64 C62 C63 H61  
C63 C61 C62 F62  
C66 C62 C61 H60  
C66 C67 C65 C64  
C65 C68 C67 N61  
C67 C69 C68 H62  
C68 C70 C69 H63  
C69 C71 C70 H64  
C70 H65 C71 N61

DONE

STOP

c) AMQ

0 0 2

This is a remark line

molecule.res

AMQ INT 0

CORRECT OMIT DU BEG

0.0000

|    |      |    |   |    |    |    |       |         |          |           |
|----|------|----|---|----|----|----|-------|---------|----------|-----------|
| 1  | DUMM | DU | M | 0  | -1 | -2 | 0.000 | .0      | .0       | .00000    |
| 2  | DUMM | DU | M | 1  | 0  | -1 | 1.449 | .0      | .0       | .00000    |
| 3  | DUMM | DU | M | 2  | 1  | 0  | 1.523 | 111.21  | .0       | .00000    |
| 4  | N62  | Y2 | M | 3  | 2  | 1  | 1.540 | 111.208 | -180.000 | -0.044813 |
| 5  | C73  | ca | M | 4  | 3  | 2  | 1.344 | 77.936  | 20.806   | -0.027419 |
| 6  | H71  | h4 | E | 5  | 4  | 3  | 1.080 | 116.142 | -163.377 | 0.147205  |
| 7  | C74  | ca | M | 5  | 4  | 3  | 1.386 | 122.789 | 17.246   | -0.113392 |
| 8  | H72  | ha | E | 7  | 5  | 4  | 1.082 | 119.878 | -179.269 | 0.153929  |
| 9  | C75  | ca | M | 7  | 5  | 4  | 1.392 | 118.684 | 1.211    | -0.065698 |
| 10 | H73  | ha | E | 9  | 7  | 5  | 1.083 | 120.745 | 179.539  | 0.165506  |
| 11 | C76  | ca | M | 9  | 7  | 5  | 1.390 | 119.303 | 0.616    | -0.144187 |
| 12 | H74  | ha | E | 11 | 9  | 7  | 1.081 | 121.114 | 177.557  | 0.150468  |
| 13 | C77  | ca | M | 11 | 9  | 7  | 1.389 | 118.100 | -1.070   | 0.182166  |
| 14 | N64  | nh | M | 13 | 11 | 9  | 1.405 | 123.221 | 178.976  | 0.106369  |
| 15 | C72  | Y4 | M | 14 | 13 | 11 | 1.378 | 119.416 | -170.049 | -0.078770 |
| 16 | N63  | nh | M | 15 | 14 | 13 | 1.349 | 104.643 | -170.879 | 0.107616  |
| 17 | C78  | c3 | 3 | 16 | 15 | 14 | 1.466 | 126.591 | 170.879  | -0.096800 |
| 18 | H66  | h1 | E | 17 | 16 | 15 | 1.085 | 108.877 | -8.238   | 0.093458  |
| 19 | H67  | h1 | E | 17 | 16 | 15 | 1.090 | 108.468 | -127.321 | 0.093458  |
| 20 | H68  | h1 | E | 17 | 16 | 15 | 1.090 | 110.531 | 112.526  | 0.093458  |
| 21 | C79  | c2 | M | 16 | 15 | 14 | 1.395 | 110.598 | -1.605   | -0.128416 |
| 22 | H69  | h4 | E | 21 | 16 | 15 | 1.076 | 121.758 | -179.577 | 0.195685  |
| 23 | C80  | c2 | M | 21 | 16 | 15 | 1.349 | 107.803 | 1.247    | -0.201846 |
| 24 | H70  | h4 | E | 23 | 21 | 16 | 1.075 | 130.578 | 178.525  | 0.213404  |

LOOP

C77 N62

C80 N64

IMPROPER

C74 H71 C73 N62  
C73 C75 C74 H72  
C76 C74 C75 H73  
C77 C75 C76 H74  
C76 N62 C77 N64  
C72 C80 N64 C77  
C80 H69 C79 N63  
C79 H70 C80 N64

DONE  
STOP

#### d) frchmod file for Pt2

REMARK GOES HERE, THIS FILE IS GENERATED BY MCPB.PY

MASS

|    |        |       |                                          |
|----|--------|-------|------------------------------------------|
| M1 | 195.08 |       | Pt ion                                   |
| Y3 | 12.01  | 0.360 | Sp2 C in pure aromatic systems           |
| Y1 | 14.01  | 0.530 | Sp2 N in pure aromatic systems           |
| Y2 | 14.01  | 0.530 | Sp2 N in pure aromatic systems           |
| Y4 | 12.01  | 0.360 | Sp2 carbons in non-pure aromatic systems |

BOND

|       |       |        |                                           |
|-------|-------|--------|-------------------------------------------|
| M1-Y1 | 104.9 | 2.1188 | Created by Seminario method using MCPB.py |
| M1-Y2 | 32.6  | 2.2399 | Created by Seminario method using MCPB.py |
| M1-Y3 | 147.3 | 2.0099 | Created by Seminario method using MCPB.py |
| M1-Y4 | 132.3 | 1.9946 | Created by Seminario method using MCPB.py |
| Y2-ca | 488.0 | 1.3390 | SOURCE3_SOURCE5 6806 0.0055               |
| Y4-nh | 435.2 | 1.3735 | SOURCE3_SOURCE5 976 0.0106                |
| ca-Y1 | 488.0 | 1.3390 | SOURCE3_SOURCE5 6806 0.0055               |
| ca-Y3 | 461.1 | 1.3984 | SOURCE1_SOURCE5 121206 0.0061             |

ANGL

|          |        |        |                                           |
|----------|--------|--------|-------------------------------------------|
| M1-Y1-ca | 140.24 | 119.70 | Created by Seminario method using MCPB.py |
| M1-Y2-ca | 144.15 | 120.06 | Created by Seminario method using MCPB.py |
| M1-Y3-ca | 193.78 | 120.02 | Created by Seminario method using MCPB.py |
| M1-Y4-nh | 200.53 | 127.25 | Created by Seminario method using MCPB.py |
| Y1-M1-Y3 | 206.93 | 79.61  | Created by Seminario method using MCPB.py |
| Y2-M1-Y1 | 154.47 | 104.81 | Created by Seminario method using MCPB.py |
| Y2-M1-Y3 | 86.22  | 161.14 | Created by Seminario method using MCPB.py |
| Y4-M1-Y1 | 115.58 | 167.30 | Created by Seminario method using MCPB.py |
| Y4-M1-Y2 | 134.85 | 76.73  | Created by Seminario method using MCPB.py |
| Y4-M1-Y3 | 168.63 | 103.08 | Created by Seminario method using MCPB.py |
| Y2-ca-ca | 68.83  | 122.94 | SOURCE3_SOURCE5 5507 1.1495               |
| Y2-ca-h4 | 51.88  | 116.03 | SOURCE3_SOURCE5 2217 0.2861               |
| Y2-ca-nh | 72.66  | 116.94 | SOURCE4_SOURCE5 2042 0.7868               |
| Y3-ca-ca | 66.62  | 120.02 | SOURCE3_SOURCE5 108055 0.7701             |
| Y4-nh-c2 | 63.86  | 126.35 | CORR_SOURCE5 14 0.8394                    |
| Y4-nh-c3 | 63.70  | 119.72 | CORR_SOURCE5 638 2.4802                   |
| Y4-nh-ca | 63.03  | 129.80 | CORR_SOURCE5 49 1.2126                    |
| ca-Y1-ca | 68.35  | 117.22 | SOURCE3_SOURCE5 3343 1.0306               |
| ca-Y2-ca | 68.35  | 117.22 | SOURCE3_SOURCE5 3343 1.0306               |
| ca-Y3-ca | 66.62  | 120.02 | SOURCE3_SOURCE5 108055 0.7701             |
| ca-ca-Y1 | 68.83  | 122.94 | SOURCE3_SOURCE5 5507 1.1495               |
| h4-ca-Y1 | 51.88  | 116.03 | SOURCE3_SOURCE5 2217 0.2861               |
| ha-ca-Y3 | 48.18  | 119.88 | SOURCE3_SOURCE5 126779 0.4424             |
| nh-Y4-nh | 72.43  | 115.96 | SOURCE3 1                                 |

DIHE

|             |   |      |       |     |                          |
|-------------|---|------|-------|-----|--------------------------|
| X-Y2-ca-X   | 2 | 9.6  | 180.0 | 2.0 | same as X-CA-NC-X        |
| X-Y3-ca-X   | 4 | 14.5 | 180.0 | 2.0 | intrpol.bsd.on C6H6      |
| X-Y4-nh-X   | 4 | 4.2  | 180.0 | 2.0 | same as X-ca-nh-X        |
| X-ca-Y1-X   | 2 | 9.6  | 180.0 | 2.0 | same as X-CA-NC-X        |
| M1-Y1-ca-ca | 3 | 0.00 | 0.00  | 3.0 | Treat as zero by MCPB.py |
| M1-Y1-ca-h4 | 3 | 0.00 | 0.00  | 3.0 | Treat as zero by MCPB.py |
| M1-Y2-ca-ca | 3 | 0.00 | 0.00  | 3.0 | Treat as zero by MCPB.py |
| M1-Y2-ca-h4 | 3 | 0.00 | 0.00  | 3.0 | Treat as zero by MCPB.py |
| M1-Y2-ca-nh | 3 | 0.00 | 0.00  | 3.0 | Treat as zero by MCPB.py |
| M1-Y3-ca-ca | 3 | 0.00 | 0.00  | 3.0 | Treat as zero by MCPB.py |
| M1-Y3-ca-ha | 3 | 0.00 | 0.00  | 3.0 | Treat as zero by MCPB.py |



|             |   |      |      |     |                          |
|-------------|---|------|------|-----|--------------------------|
| M1-Y4-nh-c2 | 3 | 0.00 | 0.00 | 3.0 | Treat as zero by MCPB.py |
| M1-Y4-nh-c3 | 3 | 0.00 | 0.00 | 3.0 | Treat as zero by MCPB.py |
| M1-Y4-nh-ca | 3 | 0.00 | 0.00 | 3.0 | Treat as zero by MCPB.py |
| Y1-M1-Y3-ca | 3 | 0.00 | 0.00 | 3.0 | Treat as zero by MCPB.py |
| Y2-M1-Y1-ca | 3 | 0.00 | 0.00 | 3.0 | Treat as zero by MCPB.py |
| Y2-M1-Y3-ca | 3 | 0.00 | 0.00 | 3.0 | Treat as zero by MCPB.py |
| Y4-M1-Y1-ca | 3 | 0.00 | 0.00 | 3.0 | Treat as zero by MCPB.py |
| Y4-M1-Y2-ca | 3 | 0.00 | 0.00 | 3.0 | Treat as zero by MCPB.py |
| Y4-M1-Y3-ca | 3 | 0.00 | 0.00 | 3.0 | Treat as zero by MCPB.py |
| ca-Y1-M1-Y3 | 3 | 0.00 | 0.00 | 3.0 | Treat as zero by MCPB.py |
| ca-Y2-M1-Y1 | 3 | 0.00 | 0.00 | 3.0 | Treat as zero by MCPB.py |
| ca-Y2-M1-Y3 | 3 | 0.00 | 0.00 | 3.0 | Treat as zero by MCPB.py |
| nh-Y4-M1-Y1 | 3 | 0.00 | 0.00 | 3.0 | Treat as zero by MCPB.py |
| nh-Y4-M1-Y2 | 3 | 0.00 | 0.00 | 3.0 | Treat as zero by MCPB.py |
| nh-Y4-M1-Y3 | 3 | 0.00 | 0.00 | 3.0 | Treat as zero by MCPB.py |

#### IMPR

|             |     |       |     |                                                                       |
|-------------|-----|-------|-----|-----------------------------------------------------------------------|
| Y1-ca-ca-ca | 1.1 | 180.0 | 2.0 | Using the default value                                               |
| Y4-c2-nh-c3 | 1.1 | 180.0 | 2.0 | Using the default value                                               |
| Y4-c2-nh-ca | 1.1 | 180.0 | 2.0 | Using the default value                                               |
| Y2-ca-ca-nh | 1.1 | 180.0 | 2.0 | Using the default value                                               |
| Y3-ca-ca-ca | 1.1 | 180.0 | 2.0 | Using the default value                                               |
| Y2-ca-ca-h4 | 1.1 | 180.0 | 2.0 | Same as X-X-ca-ha, penalty score= 44.3 (use general term))            |
| Y1-ca-ca-h4 | 1.1 | 180.0 | 2.0 | Same as X-X-ca-ha, penalty score= 44.3 (use general term))            |
| Y3-ca-ca-ha | 1.1 | 180.0 | 2.0 | Using general improper torsional angle X-X-ca-ha, penalty score= 6.0) |

#### NONB

|    |        |              |                                                                       |
|----|--------|--------------|-----------------------------------------------------------------------|
| M1 | 1.2660 | 0.0030764200 | CM set for Pt2+ ion in TIP3P water from Li et al. JCTC, 2013, 9, 2733 |
| Y3 | 1.9080 | 0.0860       | OPLS                                                                  |
| Y1 | 1.8240 | 0.1700       | OPLS                                                                  |
| Y2 | 1.8240 | 0.1700       | OPLS                                                                  |
| Y4 | 1.9080 | 0.0860       | OPLS                                                                  |
